# Supplementary material
Source: HighWire-hosted journal article supplement (https://bmjopen.bmj.com/content/11/8/e047369)
Supplement: inline-supplementary-material-1 [file inline-supplementary-material-1.pdf]

**Supplemental material**

|                                                                                                                                                                                            |            |
|--------------------------------------------------------------------------------------------------------------------------------------------------------------------------------------------|------------|
| <b>Table of Contents</b>                                                                                                                                                                   |            |
| <b>Supplemental Table 1</b> Health care resource utilization among hospitalized Veterans with COVID-19                                                                                     | <b>2</b>   |
| <b>Supplemental Table 2:</b> C statistics (95% confidence intervals) for nested models using different combination of predictors                                                           | <b>3</b>   |
| <b>Supplemental Table 3A</b> Characteristics of US Veterans with COVID-19 overall and by different month periods                                                                           | <b>4-5</b> |
| <b>Supplemental Table 3B</b> Characteristics of hospitalized US Veterans with COVID-19 overall and by different month periods                                                              | <b>6-7</b> |
| <b>Supplemental Table 4</b> Contribution of changes in demographic, health, and contextual characteristics to temporal differences in outcomes between 3/20–4/19, 2020 and 6/20–7/20, 2020 | <b>8</b>   |

**Supplemental Table 1** Health care resource utilization among hospitalized Veterans with COVID-19

| Month                    | ICU   | Mechanical Ventilation | LOS  |
|--------------------------|-------|------------------------|------|
| March 20 - April 19      | 35.6% | 20.6%                  | 13.8 |
| April 20 - May 19        | 31.0% | 13.5%                  | 16.2 |
| May 20 - June 19         | 31.2% | 11.4%                  | 12.1 |
| June 20 - July 19        | 29.7% | 11.7%                  | 11.4 |
| July 20 - August 19      | 28.2% | 11.2%                  | 11   |
| August 20 - September 19 | 31.6% | 9.3%                   | 9.6  |
| <b>Overall</b>           | 31.2% | 13.4%                  | 12.3 |

ICU: intensive care units; LOS: length of stay.

**Supplemental Table 2:** C statistics (95% confidence intervals) for nested models using different combination of predictors

| Cohort                      | Veterans with COVID-19 |                     | Hospitalized Veterans with COVID-19 |
|-----------------------------|------------------------|---------------------|-------------------------------------|
|                             | 30-day mortality       | Hospitalization     | 30-day mortality                    |
| Predictor variables         |                        |                     |                                     |
| Demographics                | 0.822 (0.816-0.828)    | 0.678 (0.673-0.684) | 0.725 (0.712-0.738)                 |
| + health characteristics    | 0.832 (0.826-0.838)    | 0.713 (0.707-0.719) | 0.740 (0.726-0.753)                 |
| + contextual factors        | 0.832 (0.826-0.838)    | 0.714 (0.708-0.720) | 0.741 (0.726-0.754)                 |
| + COVID-19 testing capacity | 0.834 (0.828-0.840)    | 0.715 (0.709-0.721) | 0.745 (0.730-0.758)                 |
| + hospital occupancy        | 0.834 (0.828-0.841)    | 0.718 (0.712-0.723) | 0.746 (0.732-0.759)                 |

Each + indicates including all the variable above that row. For example, "+ contextual factors" indicates including demographics, health characteristics, and contextual factors as predictors.

| <b>Supplemental Table 3A: Characteristics of US Veterans with COVID-19 overall and by different month periods</b> |                              |                                             |                                           |                                          |                                            |                                              |                                                  |
|-------------------------------------------------------------------------------------------------------------------|------------------------------|---------------------------------------------|-------------------------------------------|------------------------------------------|--------------------------------------------|----------------------------------------------|--------------------------------------------------|
| <b>Characteristic</b>                                                                                             | <b>Overall<br/>N = 49238</b> | <b>March 20 –<br/>April 19<br/>N = 5896</b> | <b>April 20 –<br/>May 19<br/>N = 6685</b> | <b>May 20 –<br/>June 19<br/>N = 4824</b> | <b>June 20 –<br/>July 19<br/>N = 13084</b> | <b>July 20 –<br/>August 19<br/>N = 11874</b> | <b>August 20 –<br/>September 19<br/>N = 6875</b> |
| Age, median (IQR), year                                                                                           | 63.3<br>(49.8-73.1)          | 65.3<br>(53.7-73.8)                         | 68.0<br>(56.6-76.1)                       | 63.9<br>(50.0-73.4)                      | 59.6<br>(44.7- 71.4)                       | 62.9<br>(49.6-72.8)                          | 64.3<br>(50.2-73.3)                              |
| Race, no. (%)                                                                                                     |                              |                                             |                                           |                                          |                                            |                                              |                                                  |
| White                                                                                                             | 29814 (60.6)                 | 2814 (47.7)                                 | 3908 (58.5)                               | 2877 (59.6)                              | 7991 (61.1)                                | 7496 (63.1)                                  | 4728 (68.8)                                      |
| Black                                                                                                             | 16714 (33.9)                 | 2784 (47.2)                                 | 2492 (37.3)                               | 1693 (35.1)                              | 4272 (32.7)                                | 3720 (31.3)                                  | 1753 (25.5)                                      |
| Other                                                                                                             | 2710 ( 5.5)                  | 298 ( 5.1)                                  | 285 ( 4.3)                                | 254 ( 5.3)                               | 821 ( 6.3)                                 | 658 ( 5.5)                                   | 394 ( 5.7)                                       |
| Sex, no. (%), women                                                                                               | 5673 (11.5)                  | 604 (10.2)                                  | 693 (10.4)                                | 557 (11.5)                               | 1671 (12.8)                                | 1432 (12.1)                                  | 716 (10.4)                                       |
| BMI category, no. (%)                                                                                             |                              |                                             |                                           |                                          |                                            |                                              |                                                  |
| Underweight (<8.5 kg/m <sup>2</sup> )                                                                             | 265 ( 0.5)                   | 50 ( 0.8)                                   | 56 ( 0.8)                                 | 38 ( 0.8)                                | 49 ( 0.4)                                  | 44 ( 0.4)                                    | 28 ( 0.4)                                        |
| Normal weight (18.5 to <25 kg/m <sup>2</sup> )                                                                    | 9939 (20.2)                  | 1163 (19.7)                                 | 1645 (24.6)                               | 1018 (21.1)                              | 2508 (19.2)                                | 2272 (19.1)                                  | 1333 (19.4)                                      |
| Overweight (25 to <30 kg/m <sup>2</sup> )                                                                         | 15032 (30.5)                 | 1814 (30.8)                                 | 2030 (30.4)                               | 1521 (31.5)                              | 4025 (30.8)                                | 3568 (30.0)                                  | 2074 (30.2)                                      |
| Obesity (>18.5 kg/m <sup>2</sup> )                                                                                | 24002 (48.7)                 | 2869 (48.7)                                 | 2954 (44.2)                               | 2247 (46.6)                              | 6502 (49.7)                                | 5990 (50.4)                                  | 3440 (50.0)                                      |
| Smoke, no. (%)                                                                                                    |                              |                                             |                                           |                                          |                                            |                                              |                                                  |
| Never smoker                                                                                                      | 27492 (55.8)                 | 3077 (52.2)                                 | 3411 (51.0)                               | 2624 (54.4)                              | 7799 (59.6)                                | 6843 (57.6)                                  | 3738 (54.4)                                      |
| Former smoker                                                                                                     | 13062 (26.5)                 | 1906 (32.3)                                 | 2027 (30.3)                               | 1292 (26.8)                              | 2965 (22.7)                                | 2974 (25.0)                                  | 1898 (27.6)                                      |
| Current smoker                                                                                                    | 8684 (17.6)                  | 913 (15.5)                                  | 1247 (18.7)                               | 908 (18.8)                               | 2320 (17.7)                                | 2057 (17.3)                                  | 1239 (18.0)                                      |
| Hypertension, no. (%)                                                                                             | 30568 (62.1)                 | 3769 (63.9)                                 | 4077 (61.0)                               | 2993 (62.0)                              | 8052 (61.5)                                | 7370 (62.1)                                  | 4307 (62.6)                                      |
| Diabetes, no. (%)                                                                                                 | 13717 (27.9)                 | 1863 (31.6)                                 | 1996 (29.9)                               | 1360 (28.2)                              | 3301 (25.2)                                | 3315 (27.9)                                  | 1882 (27.4)                                      |
| Cancer, no. (%)                                                                                                   | 4558 ( 9.3)                  | 728 (12.3)                                  | 695 (10.4)                                | 443 ( 9.2)                               | 1043 ( 8.0)                                | 1014 ( 8.5)                                  | 635 ( 9.2)                                       |
| Cardiovascular disease, no. (%)                                                                                   | 10399 (21.1)                 | 1512 (25.6)                                 | 1706 (25.5)                               | 1048 (21.7)                              | 2307 (17.6)                                | 2368 (19.9)                                  | 1458 (21.2)                                      |
| Cerebrovascular disease, no. (%)                                                                                  | 5192 (10.5)                  | 801 (13.6)                                  | 1011 (15.1)                               | 503 (10.4)                               | 1091 ( 8.3)                                | 1112 ( 9.4)                                  | 674 ( 9.8)                                       |
| Dementia, no. (%)                                                                                                 | 5350 (10.9)                  | 887 (15.0)                                  | 1268 (19.0)                               | 586 (12.1)                               | 988 ( 7.6)                                 | 999 ( 8.4)                                   | 622 ( 9.0)                                       |
| Chronic kidney disease, no. (%)                                                                                   | 9573 (21.9)                  | 1390 (26.1)                                 | 1477 (26.2)                               | 963 (22.9)                               | 2161 (18.4)                                | 2237 (20.9)                                  | 1345 (21.8)                                      |
| Peripheral artery disease, no. (%)                                                                                | 1411 ( 2.9)                  | 247 ( 4.2)                                  | 261 ( 3.9)                                | 140 ( 2.9)                               | 301 ( 2.3)                                 | 277 ( 2.3)                                   | 185 ( 2.7)                                       |
| HIV, no. (%)                                                                                                      | 504 ( 1.0)                   | 91 ( 1.5)                                   | 75 ( 1.1)                                 | 58 ( 1.2)                                | 130 ( 1.0)                                 | 99 ( 0.8)                                    | 51 ( 0.7)                                        |
| Pneumonia, no. (%)                                                                                                | 765 ( 1.6)                   | 205 ( 3.5)                                  | 191 ( 2.9)                                | 83 ( 1.7)                                | 108 ( 0.8)                                 | 100 ( 0.8)                                   | 78 ( 1.1)                                        |
| COPD, no. (%)                                                                                                     | 7666 (15.6)                  | 1143 (19.4)                                 | 1285 (19.2)                               | 765 (15.9)                               | 1670 (12.8)                                | 1702 (14.3)                                  | 1101 (16.0)                                      |
| ADI rank category, no. (%)                                                                                        |                              |                                             |                                           |                                          |                                            |                                              |                                                  |
| 0 to 33.3                                                                                                         | 10248 (20.8)                 | 1816 (30.8)                                 | 2003 (30.0)                               | 1026 (21.3)                              | 2356 (18.0)                                | 1944 (16.4)                                  | 1103 (16.0)                                      |

|                                                                                                                                                                                                                                      |              |             |             |             |             |             |             |
|--------------------------------------------------------------------------------------------------------------------------------------------------------------------------------------------------------------------------------------|--------------|-------------|-------------|-------------|-------------|-------------|-------------|
| 33.4 to 66.6                                                                                                                                                                                                                         | 20861 (42.4) | 2203 (37.4) | 2594 (38.8) | 1967 (40.8) | 5788 (44.2) | 5113 (43.1) | 3196 (46.5) |
| 66.7 to 100                                                                                                                                                                                                                          | 18129 (36.8) | 1877 (31.8) | 2088 (31.2) | 1831 (38.0) | 4940 (37.8) | 4817 (40.6) | 2576 (37.5) |
| COVID-19 testing capacity,<br>mean (SD),<br>per 10000 people                                                                                                                                                                         | 3.1 (1.9)    | 1.3 (0.9)   | 1.7 (1.0)   | 2.1 (1.2)   | 4.1 (2.1)   | 3.7 (1.6)   | 3.8 (1.7)   |
| Hospital occupancy,<br>mean (SD), %                                                                                                                                                                                                  | 37.0 (10.8)  | 41.3 (11.8) | 35.4 (9.9)  | 35.8 (10.2) | 36.5 (10.3) | 37.0 (10.5) | 36.8 (11.5) |
| ADI: area deprivation index; COPD: Chronic obstructive pulmonary disease; eGFR: Estimated Glomerular Filtration Rate; HIV: Human immunodeficiency virus; IQR: interquartile range; IQR: interquartile range; SD: standard deviation. |              |             |             |             |             |             |             |

| <b>Supplemental Table 3B: Characteristics of hospitalized US Veterans with COVID-19 overall and by different month periods</b> |                             |                                             |                                           |                                         |                                           |                                             |                                                  |
|--------------------------------------------------------------------------------------------------------------------------------|-----------------------------|---------------------------------------------|-------------------------------------------|-----------------------------------------|-------------------------------------------|---------------------------------------------|--------------------------------------------------|
| <b>Characteristic</b>                                                                                                          | <b>Overall<br/>N = 9428</b> | <b>March 20 –<br/>April 19<br/>N = 1992</b> | <b>April 20 –<br/>May 19<br/>N = 1152</b> | <b>May 20 –<br/>June 19<br/>N = 966</b> | <b>June 20 –<br/>July 19<br/>N = 2274</b> | <b>July 20 –<br/>August 19<br/>N = 1872</b> | <b>August 20 –<br/>September 19<br/>N = 1172</b> |
| Age, median (IQR), year                                                                                                        | 70.6<br>(61.2-76.8)         | 70.7<br>(61.8, 76.7)                        | 72.2<br>(63.7-79.3)                       | 69.7<br>(59.7- 76.8)                    | 69.1<br>(58.9-75.6)                       | 70.8<br>(61.1-76.5)                         | 71.5<br>(62.3-77.2)                              |
| Race, no. (%)                                                                                                                  |                             |                                             |                                           |                                         |                                           |                                             |                                                  |
| White                                                                                                                          | 5054 (53.6)                 | 811 (40.7)                                  | 607 (52.7)                                | 533 (55.2)                              | 1255 (55.2)                               | 1081 (57.7)                                 | 767 (65.4)                                       |
| Black                                                                                                                          | 3809 (40.4)                 | 1084 (54.4)                                 | 496 (43.1)                                | 389 (40.3)                              | 861 (37.9)                                | 649 (34.7)                                  | 330 (28.2)                                       |
| Other                                                                                                                          | 565 ( 6.0)                  | 97 ( 4.9)                                   | 49 ( 4.3)                                 | 44 ( 4.6)                               | 158 ( 6.9)                                | 142 ( 7.6)                                  | 75 ( 6.4)                                        |
| Sex, no. (%), women                                                                                                            | 527 ( 5.6)                  | 95 ( 4.8)                                   | 53 ( 4.6)                                 | 73 ( 7.6)                               | 147 ( 6.5)                                | 112 ( 6.0)                                  | 47 ( 4.0)                                        |
| BMI category, no. (%)                                                                                                          |                             |                                             |                                           |                                         |                                           |                                             |                                                  |
| Underweight (<8.5 kg/m <sup>2</sup> )                                                                                          | 83 ( 0.9)                   | 24 ( 1.2)                                   | 14 ( 1.2)                                 | 10 ( 1.0)                               | 18 ( 0.8)                                 | 12 ( 0.6)                                   | 5 ( 0.4)                                         |
| Normal weight (18.5 to <25 kg/m <sup>2</sup> )                                                                                 | 1836 (19.5)                 | 387 (19.4)                                  | 276 (24.0)                                | 182 (18.8)                              | 423 (18.6)                                | 350 (18.7)                                  | 218 (18.6)                                       |
| Overweight (25 to <30 kg/m <sup>2</sup> )                                                                                      | 2922 (31.0)                 | 611 (30.7)                                  | 344 (29.9)                                | 322 (33.3)                              | 684 (30.1)                                | 582 (31.1)                                  | 379 (32.3)                                       |
| Obesity (>18.5 kg/m <sup>2</sup> )                                                                                             | 4587 (48.7)                 | 970 (48.7)                                  | 518 (45.0)                                | 452 (46.8)                              | 1149 (50.5)                               | 928 (49.6)                                  | 570 (48.6)                                       |
| Smoke, no. (%)                                                                                                                 |                             |                                             |                                           |                                         |                                           |                                             |                                                  |
| Never smoker                                                                                                                   | 4713 (50.0)                 | 913 (45.8)                                  | 511 (44.4)                                | 474 (49.1)                              | 1250 (55.0)                               | 980 (52.4)                                  | 585 (49.9)                                       |
| Former smoker                                                                                                                  | 2956 (31.4)                 | 766 (38.5)                                  | 409 (35.5)                                | 283 (29.3)                              | 607 (26.7)                                | 535 (28.6)                                  | 356 (30.4)                                       |
| Current smoker                                                                                                                 | 1759 (18.7)                 | 313 (15.7)                                  | 232 (20.1)                                | 209 (21.6)                              | 417 (18.3)                                | 357 (19.1)                                  | 231 (19.7)                                       |
| Hypertension, no. (%)                                                                                                          | 6347 (67.3)                 | 1345 (67.5)                                 | 763 (66.2)                                | 649 (67.2)                              | 1546 (68.0)                               | 1264 (67.5)                                 | 780 (66.6)                                       |
| Diabetes, no. (%)                                                                                                              | 3695 (39.2)                 | 798 (40.1)                                  | 473 (41.1)                                | 386 (40.0)                              | 856 (37.6)                                | 715 (38.2)                                  | 467 (39.8)                                       |
| Cancer, no. (%)                                                                                                                | 1443 (15.3)                 | 346 (17.4)                                  | 169 (14.7)                                | 150 (15.5)                              | 328 (14.4)                                | 261 (13.9)                                  | 189 (16.1)                                       |
| Cardiovascular disease, no. (%)                                                                                                | 3417 (36.2)                 | 735 (36.9)                                  | 453 (39.3)                                | 338 (35.0)                              | 773 (34.0)                                | 674 (36.0)                                  | 444 (37.9)                                       |
| Cerebrovascular disease, no. (%)                                                                                               | 1836 (19.5)                 | 403 (20.2)                                  | 279 (24.2)                                | 179 (18.5)                              | 399 (17.5)                                | 328 (17.5)                                  | 248 (21.2)                                       |
| Dementia, no. (%)                                                                                                              | 1953 (20.7)                 | 420 (21.1)                                  | 345 (29.9)                                | 212 (21.9)                              | 398 (17.5)                                | 336 (17.9)                                  | 242 (20.6)                                       |
| Chronic kidney disease, no. (%)                                                                                                | 3042 (34.9)                 | 704 (37.8)                                  | 368 (35.9)                                | 293 (33.2)                              | 716 (33.7)                                | 575 (33.3)                                  | 386 (35.5)                                       |
| Peripheral artery disease, no. (%)                                                                                             | 543 ( 5.8)                  | 127 ( 6.4)                                  | 87 ( 7.6)                                 | 59 ( 6.1)                               | 120 ( 5.3)                                | 92 ( 4.9)                                   | 58 ( 4.9)                                        |
| HIV, no. (%)                                                                                                                   | 141 ( 1.5)                  | 44 ( 2.2)                                   | 16 ( 1.4)                                 | 12 ( 1.2)                               | 40 ( 1.8)                                 | 23 ( 1.2)                                   | 6 ( 0.5)                                         |
| Pneumonia, no. (%)                                                                                                             | 336 ( 3.6)                  | 104 ( 5.2)                                  | 59 ( 5.1)                                 | 37 ( 3.8)                               | 51 ( 2.2)                                 | 50 ( 2.7)                                   | 35 ( 3.0)                                        |
| COPD, no. (%)                                                                                                                  | 2429 (25.8)                 | 524 (26.3)                                  | 311 (27.0)                                | 251 (26.0)                              | 549 (24.1)                                | 462 (24.7)                                  | 332 (28.3)                                       |
| ADI rank category, no. (%)                                                                                                     |                             |                                             |                                           |                                         |                                           |                                             |                                                  |
| 0 to 33.3                                                                                                                      | 1785 (18.9)                 | 583 (29.3)                                  | 290 (25.2)                                | 169 (17.5)                              | 335 (14.7)                                | 249 (13.3)                                  | 159 (13.6)                                       |
| 33.4 to 66.6                                                                                                                   | 3643 (38.6)                 | 671 (33.7)                                  | 454 (39.4)                                | 383 (39.6)                              | 904 (39.8)                                | 733 (39.2)                                  | 498 (42.5)                                       |
| 66.7 to 100                                                                                                                    | 4000 (42.4)                 | 738 (37.0)                                  | 408 (35.4)                                | 414 (42.9)                              | 1035 (45.5)                               | 890 (47.5)                                  | 515 (43.9)                                       |

|                                                                                                                                                                                                            |             |             |            |            |            |             |             |
|------------------------------------------------------------------------------------------------------------------------------------------------------------------------------------------------------------|-------------|-------------|------------|------------|------------|-------------|-------------|
| COVID-19 testing capacity, mean (SD), per 10000 people                                                                                                                                                     | 2.8 (1.8)   | 1.2 (0.9)   | 1.6 (0.8)  | 2.1 (1.1)  | 3.9 (1.5)  | 3.8 (1.4)   | 4.0 (1.7)   |
| Hospital occupancy, mean (SD), %                                                                                                                                                                           | 38.1 (10.5) | 42.4 (11.3) | 35.0 (9.7) | 36.1 (8.9) | 38.1 (9.4) | 37.1 (10.4) | 37.0 (10.6) |
| ADI: area deprivation index; COPD: Chronic obstructive pulmonary disease; eGFR: Estimated Glomerular Filtration Rate; HIV: Human immunodeficiency virus; IQR: interquartile range; SD: standard deviation. |             |             |            |            |            |             |             |

**Supplemental Table 4** Contribution of changes in demographic, health, and contextual characteristics to temporal differences in outcomes between 3/20–4/19, 2020 and 6/20–7/20, 2020

| Factors                                                                                                                              | Among Veterans with COVID-19  |                                                           |                              |                                                           | Among hospitalized Veterans with COVID-19 |                                                           |
|--------------------------------------------------------------------------------------------------------------------------------------|-------------------------------|-----------------------------------------------------------|------------------------------|-----------------------------------------------------------|-------------------------------------------|-----------------------------------------------------------|
|                                                                                                                                      | 30-day mortality rate changes |                                                           | Hospitalization rate changes |                                                           | 30-day mortality rate changes             |                                                           |
|                                                                                                                                      | Predicted rate of change      | Percent contribution to total change (predicted/observed) | Predicted rate of change     | Percent contribution to total change (predicted/observed) | Predicted rate of change                  | Percent contribution to total change (predicted/observed) |
| Demographics                                                                                                                         | -2.4%                         | 26.1%                                                     | -3.3%                        | 19.6%                                                     | -3.0%                                     | 23.6%                                                     |
| Health characteristics                                                                                                               | -0.7%                         | 7.6%                                                      | -1.5%                        | 9.0%                                                      | -0.3%                                     | 2.4%                                                      |
| Contextual characteristics                                                                                                           | 0.1%                          | -1.1%                                                     | 0.1%                         | -0.6%                                                     | 0.1%                                      | -0.8%                                                     |
| COVID-19 testing capacity                                                                                                            | -0.5%                         | 5.4%                                                      | -0.9%                        | 5.4%                                                      | -0.2%                                     | 1.6%                                                      |
| Hospital occupancy                                                                                                                   | -0.2%                         | 2.2%                                                      |                              |                                                           | -0.4%                                     | 3.1%                                                      |
| <b>Net rate of change predicted by demographic, health, contextual characteristics, testing capacity, and hospital occupancy (A)</b> | <b>-3.7%</b>                  | <b>40.2%</b>                                              | <b>-5.6%</b>                 | <b>33.3%</b>                                              | <b>-3.8%</b>                              | <b>29.9%</b>                                              |
| Observed rate of change (B)                                                                                                          | -9.2%                         |                                                           | -16.8%                       |                                                           | -12.7%                                    |                                                           |
| Epidemiological change (difference between observed and net predicted rate of change) (B)-(A)                                        | -5.5%                         | 59.8%                                                     | -11.2%                       | 66.7%                                                     | -8.9%                                     | 70.1%                                                     |

Demographics include age, race, and gender; Health characteristics include BMI, diabetes, cancer, cardiovascular disease, cerebrovascular disease, chronic kidney disease, dementia, HIV, hypertension, peripheral artery disease, pneumonia, and smoking status; contextual factors include ADI; epidemiological change includes the 30-day periods of testing positive dates.
